# Supplementary material for: Liposome Formulation and In Vitro Testing in Non-Physiological Conditions Addressed to Ex Vivo Kidney Perfusion
Source: MDPI journal article supplement (doi:10.3390/ijms23147999), 2022-07-20
Supplement: s1 [file s1]

## SUPPLEMENTARY DATA

Table S1: dimension, PDI and zeta-potential comparison of liposome's different molar ratio formulation prepared by thin film hydration method followed by extrusion.

| <b>Batches</b> | <b>Molar ratio<br/>(DSPC:Chol)</b> | <b>Lipids<br/>concentration<br/>(mM)</b> | <b>Dimension<br/>(nm <math>\pm</math>SD)</b> | <b>PDI</b> | <b>Zeta-<br/>Potential</b> |
|----------------|------------------------------------|------------------------------------------|----------------------------------------------|------------|----------------------------|
| A              | 90:10                              | 8                                        | 1916.4 $\pm$ 5.66                            | 1.11       | + 1.07                     |
| B              | 70:30                              | 8                                        | 1419 $\pm$ 4.78                              | 1.73       | + 0.9                      |
| C (#1)         | 50:50                              | 8                                        | 163.9 $\pm$ 3.25                             | 0.227      | + 1.18                     |
| D              | 30:70                              | 8                                        | 252.6 $\pm$ 5.90                             | 0.264      | + 1.2                      |
| E              | 10:90                              | 8                                        | 251.35 $\pm$ 6.00                            | 0.37       | + 1.15                     |
| F              | 50:50                              | 2.7                                      | 904.8 $\pm$ 82.1                             | 0.49       | + 0.94                     |

Table S2: dimension, PDI and zeta-potential of liposome's batches with different composition and prepared by Nanoassemblr.

| <b>Batches</b> | <b>Molar ratio<br/>DSPC:Chol</b> | <b>FRR<br/>(PBS:Lipids)</b> | <b>TFR</b> | <b>Dimension<br/>(nm <math>\pm</math>SD)</b> | <b>PDI</b> | <b>Zeta-<br/>Potential<br/>mV</b> |
|----------------|----------------------------------|-----------------------------|------------|----------------------------------------------|------------|-----------------------------------|
| G              | 90:10                            | 5:1                         | 8ml/min    | 132.75 $\pm$ 11.52                           | 0.09       | +1.3                              |
| H              | 90:10                            | 5:1                         | 12ml/min   | 140.7 $\pm$ 21.21                            | 0.18       | +1.14                             |
| I              | 70:30                            | 5:1                         | 8ml/min    | 265.6 $\pm$ 10.08                            | 0.36       | +0.96                             |
| L              | 70:30                            | 5:1                         | 12ml/min   | 213.5 $\pm$ 12.3                             | 0.07       | +1.0                              |
| M              | 50:50                            | 5:1                         | 8ml/min    | 113.6 $\pm$ 42                               | 0.17       | +1.06                             |
| N              | 50:50                            | 5:1                         | 12ml/min   | 112.9 $\pm$ 0.7                              | 0.23       | +1.10                             |
| O              | 30:70                            | 5:1                         | 8ml/min    | 4662.8 $\pm$ 3893                            | 0.70       | +0.91                             |
| P              | 30:70                            | 5:1                         | 12ml/min   | 147 $\pm$ 47.9                               | 0.70       | +0.87                             |
| Q              | 10:90                            | 5:1                         | 8ml/min    | 384 $\pm$ 20.4                               | 0.8        | +1.19                             |
| R              | 10:90                            | 5:1                         | 12ml/min   | 390 $\pm$ 13.5                               | 0.85       | +1.29                             |
| S (#2)         | 50:50                            | 3:1                         | 8ml/min    | 112.9 $\pm$ 0.7                              | 0.23       | +1.11                             |
| T              | 50:50                            | 3:1                         | 12ml/min   | 124.8 $\pm$ 0.56                             | 0.38       | +1.07                             |

Table S3 reports the DSPC:Chol liposomes batches obtained using thin film hydration method followed by extrusion at different DSPC:Chol molar ratio and volumes of PBS (pH 7.4) used as rehydrating buffer.

Table S3: Liposome compositions tested by TFH.

| <i>Batches</i> | <i>DSPC<br/>(<math>\mu</math>l)</i> | <i>DSPC<br/>(mg)</i> | <i>DSPC<br/>(<math>\mu</math>mol)</i> | <i>Chol(<math>\mu</math>l)</i> | <i>Chol<br/>(mg)</i> | <i>Chol<br/>(<math>\mu</math>mol)</i> | <i>Molar<br/>ratio<br/>DSPC:<br/>Chol</i> | <i>Total<br/>amount<br/>of<br/>lipids<br/>(<math>\mu</math>mol)</i> | <i>PBS<br/>(ml)</i> |
|----------------|-------------------------------------|----------------------|---------------------------------------|--------------------------------|----------------------|---------------------------------------|-------------------------------------------|---------------------------------------------------------------------|---------------------|
| A              | 800                                 | 8                    | 10                                    | 43.3                           | 0.43                 | 1.12                                  | 90:10                                     | 11.24                                                               | 1.265               |
| B              | 800                                 | 8                    | 10                                    | 160                            | 1.6                  | 4.1                                   | 70:30                                     | 14.1                                                                | 1.76                |
| <b>C (#1)</b>  | <b>460</b>                          | <b>4.7</b>           | <b>5.9</b>                            | <b>195</b>                     | <b>2.16</b>          | <b>5.6</b>                            | <b>50:50</b>                              | <b>11.5</b>                                                         | <b>1.3</b>          |
| D              | 197                                 | 1.97                 | 2.5                                   | 261                            | 2.61                 | 6.75                                  | 10:90                                     | 9.26                                                                | 1.16                |
| E              | 200                                 | 2                    | 2.53                                  | 654                            | 6.53                 | 16.9                                  | 10:90                                     | 19.4                                                                | 0.242               |
| F              | 460                                 | 4.7                  | 5.9                                   | 195                            | 2.16                 | 5.6                                   | 50:50                                     | 11.5                                                                | 6.433               |

All liposomes' batches were characterized for their dimension, polydispersity index (PDI), Z-potential and stability (4°C).

Table S2 lists the composition DSPC:Chol liposomes batches obtained using NanoAssemblr technique, variable DSPC:Cholesterol molar ratios, FRR and TFR.

Table S4: Liposome compositions and process parameters tested by microfluidic technique.

| <i>Batches</i> | <i>DSPC:Cholesterol</i> | <i>FRR<br/>(PBS:Lipid<br/>ethanol<br/>solution)</i> | <i>Lipids volume<br/>(ml)</i> | <i>Lipids (mg/ml)</i> | <i>TFR</i> |
|----------------|-------------------------|-----------------------------------------------------|-------------------------------|-----------------------|------------|
| G              | 90:10                   | 5:1                                                 | 0.2                           | 0.93                  | 8ml/min    |
| H              | 90:10                   | 5:1                                                 | 0.2                           | 0.93                  | 12ml/min   |
| I              | 70:30                   | 5:1                                                 | 0.2                           | 1.05                  | 8ml/min    |
| L              | 70:30                   | 5:1                                                 | 0.2                           | 1.05                  | 12ml/min   |
| M              | 50:50                   | 5:1                                                 | 0.2                           | 1.26                  | 8 ml/min   |
| N              | 50:50                   | 5:1                                                 | 0.2                           | 1.26                  | 12 ml/min  |
| O              | 30:70                   | 5:1                                                 | 0.2                           | 1.13                  | 8ml/min    |
| P              | 30:70                   | 5:1                                                 | 0.2                           | 1.13                  | 12ml/min   |

|   |              |            |             |             |                 |
|---|--------------|------------|-------------|-------------|-----------------|
| Q | 10:90        | 5:1        | 0.2         | 1.8         | 8ml/min         |
| R | 10:90        | 5:1        | 0.2         | 1.8         | 12ml/min        |
| S | <b>50:50</b> | <b>3:1</b> | <b>0.25</b> | <b>1.58</b> | <b>8 ml/min</b> |
| T | 50:50        | 3:1        | 0.25        | 1.58        | 12 ml/min       |

All liposomes' batches were characterized for their dimension, polydispersity index (PDI), Z-potential and stability (4°C).
